# Supplementary material for: Exploration of the Transglycosylation Activity of Barley Limit Dextrinase for Production of Novel Glycoconjugates
Source: MDPI journal article supplement (doi:10.3390/molecules28104111), 2023-05-16
Supplement: s1 [file s1]

# Exploration of the Transglycosylation Activity of Barley Limit Dextrinase for Production of Novel Glycoconjugates

Malene Bech Vester-Christensen <sup>1</sup>, Jesper Holck <sup>2</sup>, Martin Rejzek <sup>3</sup>, Léa Perrin <sup>4</sup>, Morten Tovborg <sup>5</sup>, Birte Svensson <sup>1</sup>, Robert A. Field <sup>3</sup> and Marie Sofie Møller <sup>4,\*</sup>

<sup>1</sup> Enzyme and Protein Chemistry, Department of Biotechnology and Biomedicine, Technical University of Denmark, DK-2800 Kgs. Lyngby (M.B.V-C. present address: Antibody Technology, Novo Nordisk A/S, DK2760 Måløv)

<sup>2</sup> Enzyme Technology, Department of Biotechnology and Biomedicine, Technical University of Denmark, DK-2800 Kgs. Lyngby

<sup>3</sup> Department of Biological Chemistry, John Innes Centre, Norwich Research Park, Norwich NR4 7TJ, UK. (R.A.F. present address: Department of Chemistry and Manchester Institute of Biotechnology, University of Manchester, Manchester M1 7DN, UK)

<sup>4</sup> Applied Molecular Enzyme Chemistry, Department of Biotechnology and Biomedicine, Technical University of Denmark, DK-2800 Kgs. Lyngby

<sup>5</sup> Novozymes A/S, DK-2800 Kgs. Lyngby

\* Correspondence: msmo@dtu.dk



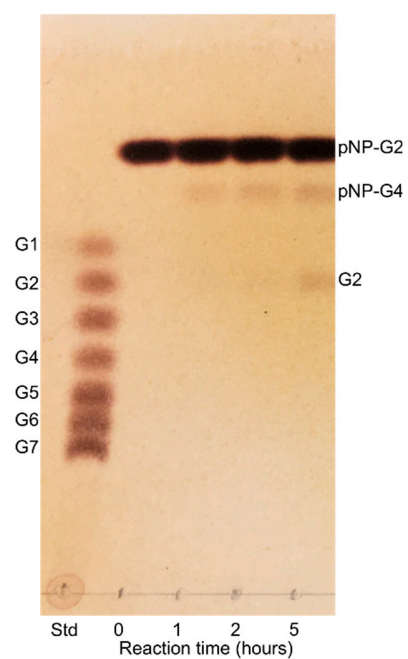

**Figure S2.** Thin layer chromatography (TLC) analysis of the *Hv*LD TG reaction with pNP maltoside (pNP-G2) functioning both as donor and acceptor. Glucose and maltooligosaccharides (G2 to G7) are included as standards. Released para-nitrophenol (pNP) is not stained by the stainer used.

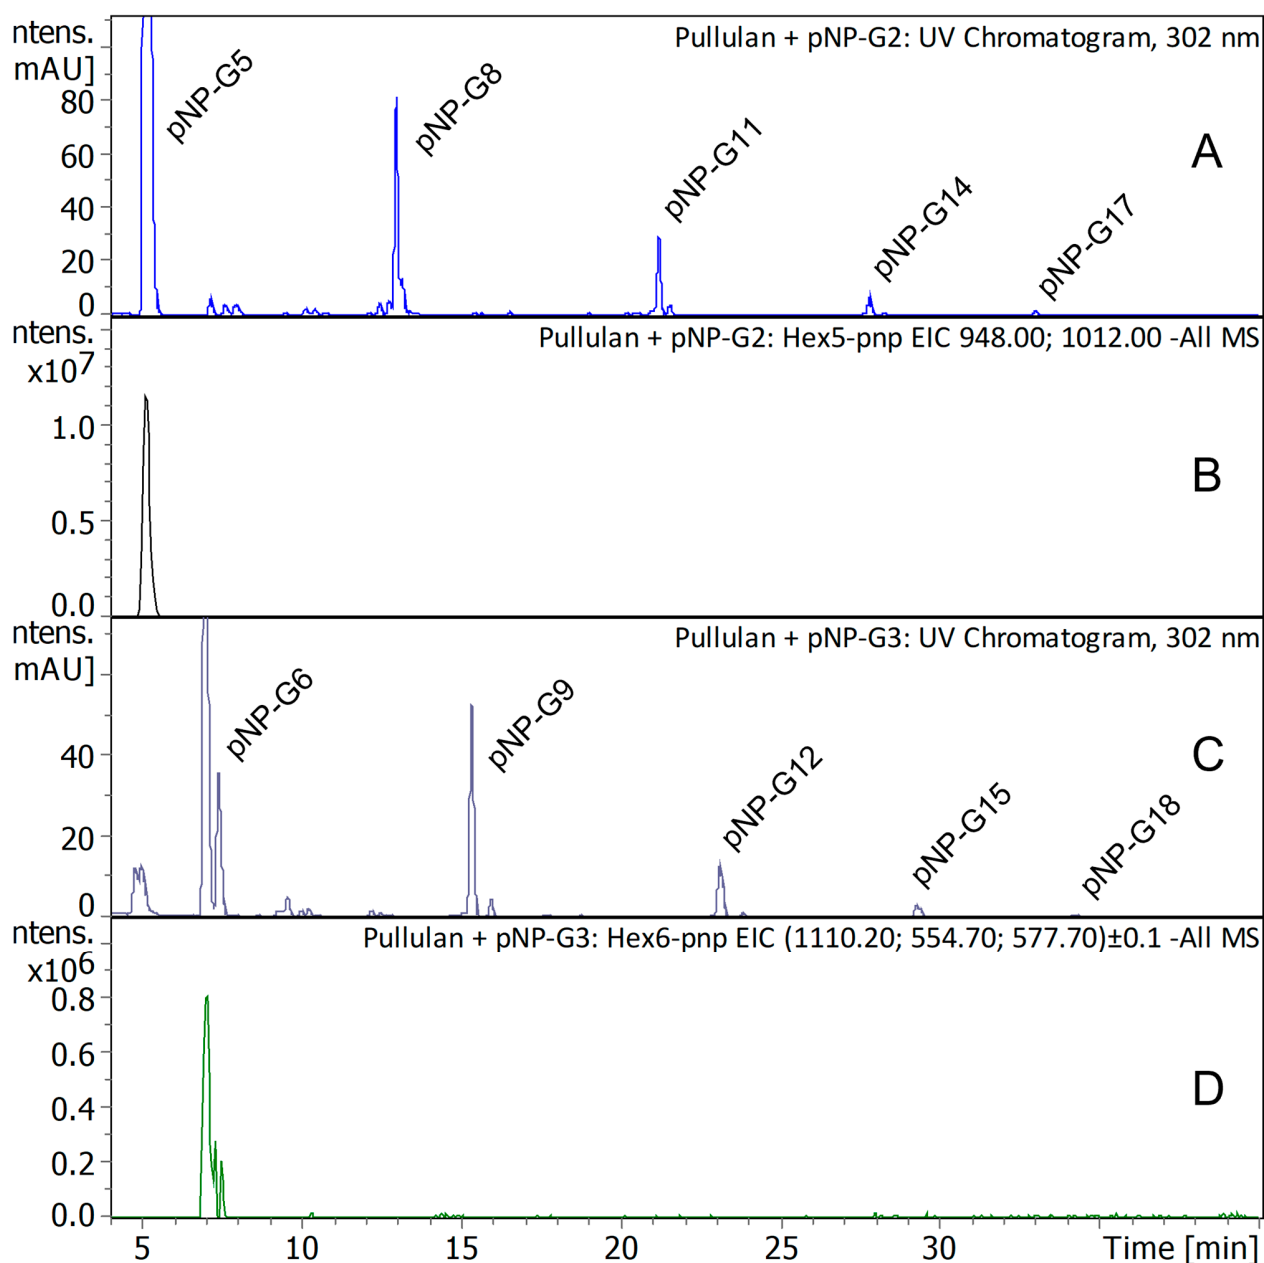

**Figure S3.** Dual peaks observed in both UV and extracted ion chromatograms indicating the presence of more than one structural isomer. Representative UV chromatograms of reactions with pullulan and pNP-G2 (A) or pNP-G3 (C). Extracted ion chromatograms of TG products pNP-G5 (B) and pNP-G6 (D). The TG reaction time was 2 hours.

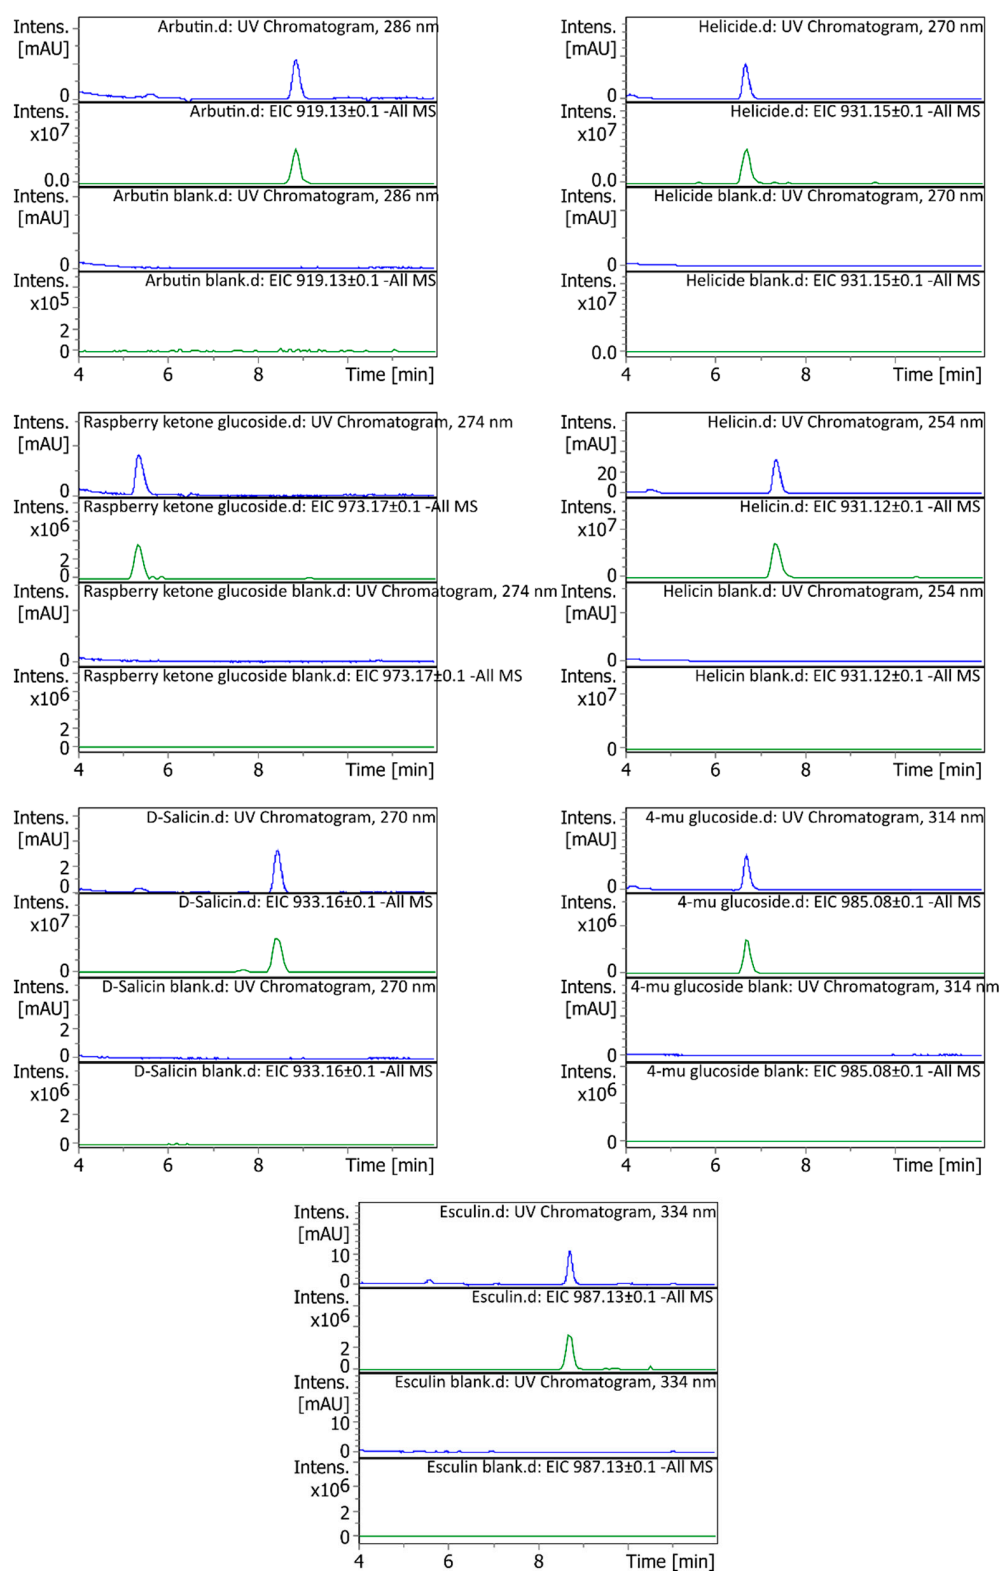

**Figure S4.** Extracted UV chromatograms and the corresponding extracted ion chromatogram of TG products using alternative acceptors compared with blank reactions. The TG reaction time was 2 hours.

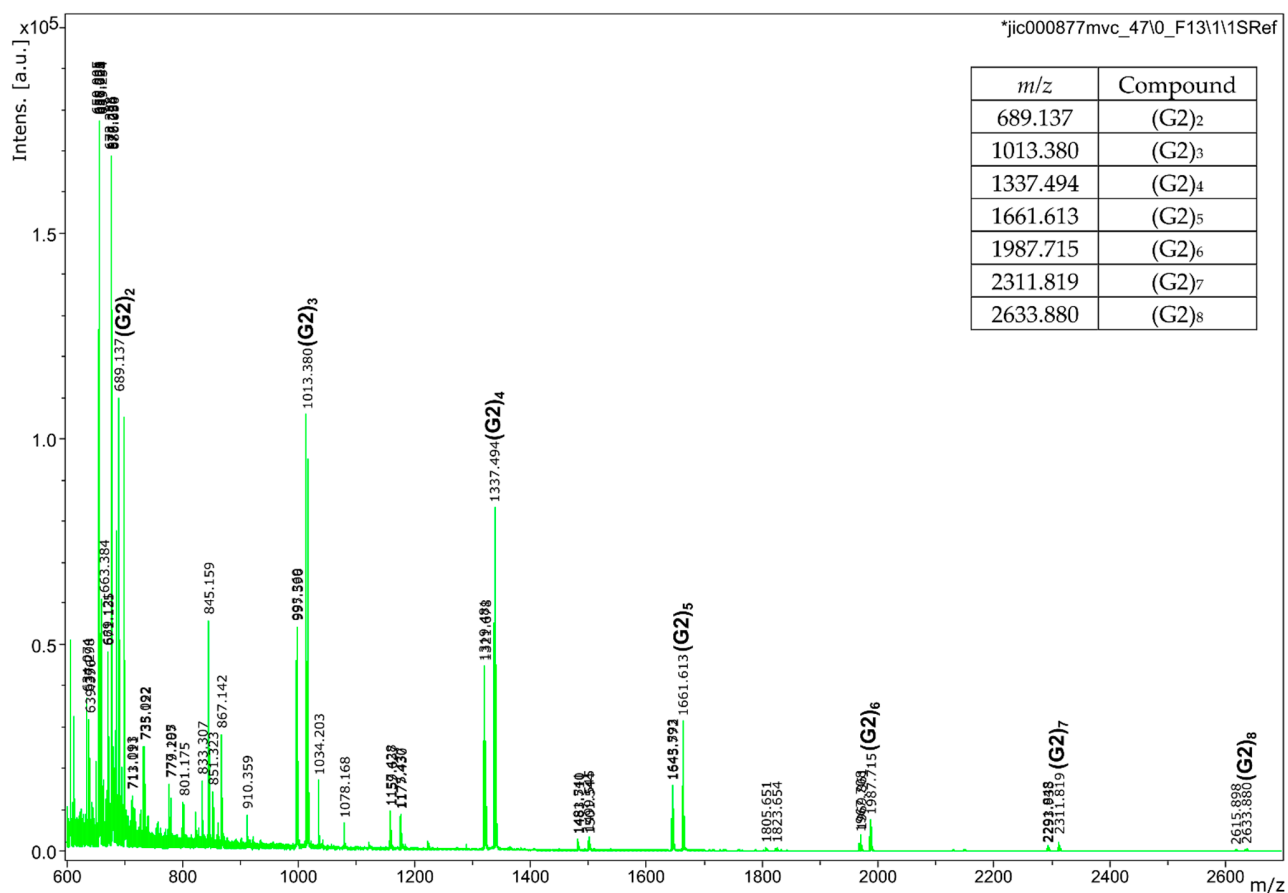

**Figure S5.** MALDI-TOF spectrum of TG products from 60 min reaction including G2F as donor and maltose (G2) as acceptor.

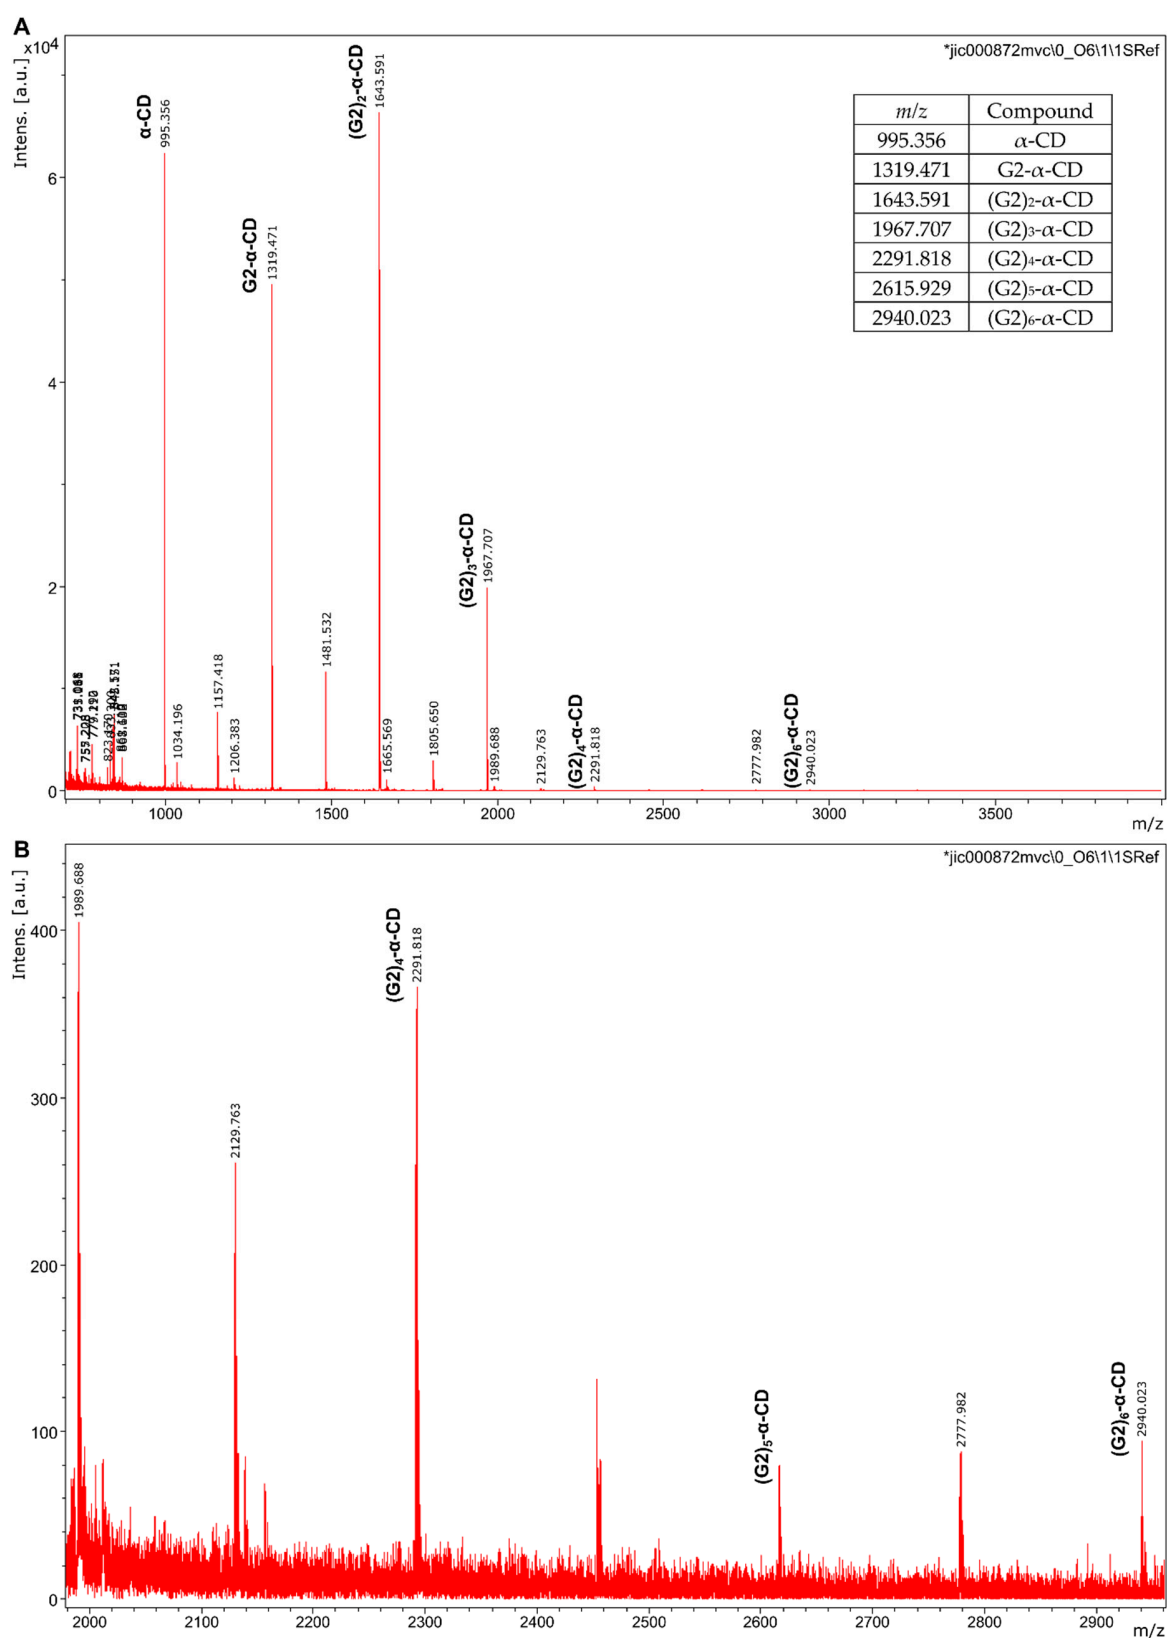

**Figure S6.** MALDI-TOF spectrum of TG products from 180 min reaction including  $\alpha$ -maltosyl fluoride (G2F) as donor and  $\alpha$ -CD as acceptor. (A) Full range and (B) zoomed range of panel A.

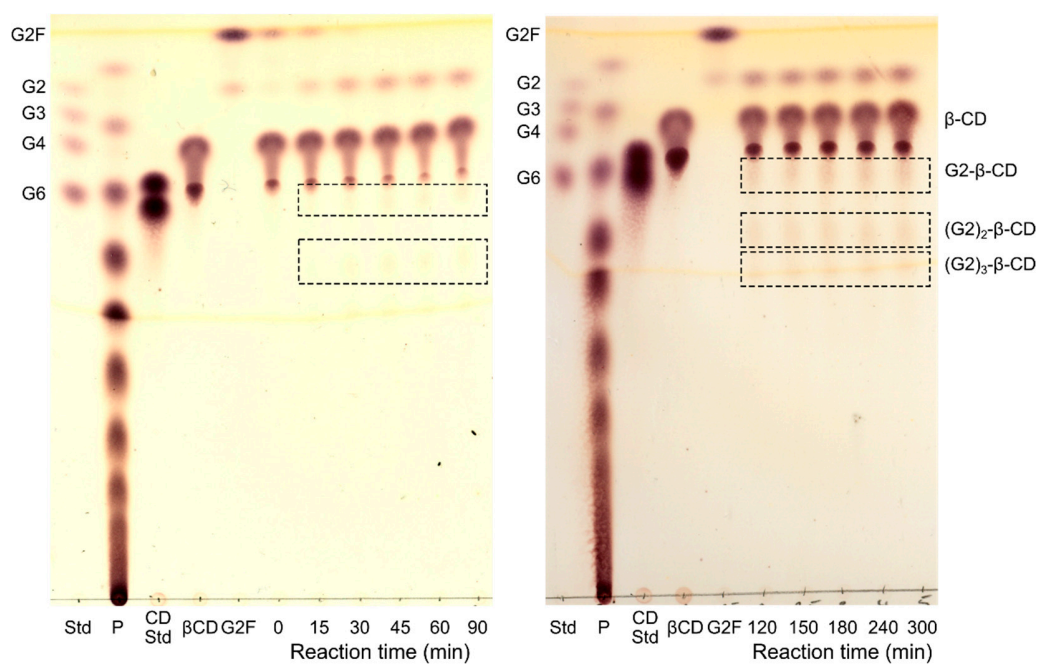

**Figure S7.** TLC analysis of TG reaction using G2F as donor and  $\beta$ -CD as acceptor. Donor:acceptor ratio of 1:1 (10 mM:10 mM). TG products are framed. Maltooligosaccharides (G2, G3, G4, and G6) are included as standards (Std) together with a pullulan standard (P; see Figure 5 for content) and a mix of G- $\beta$ -CD and G2- $\beta$ -CD (CD Std).

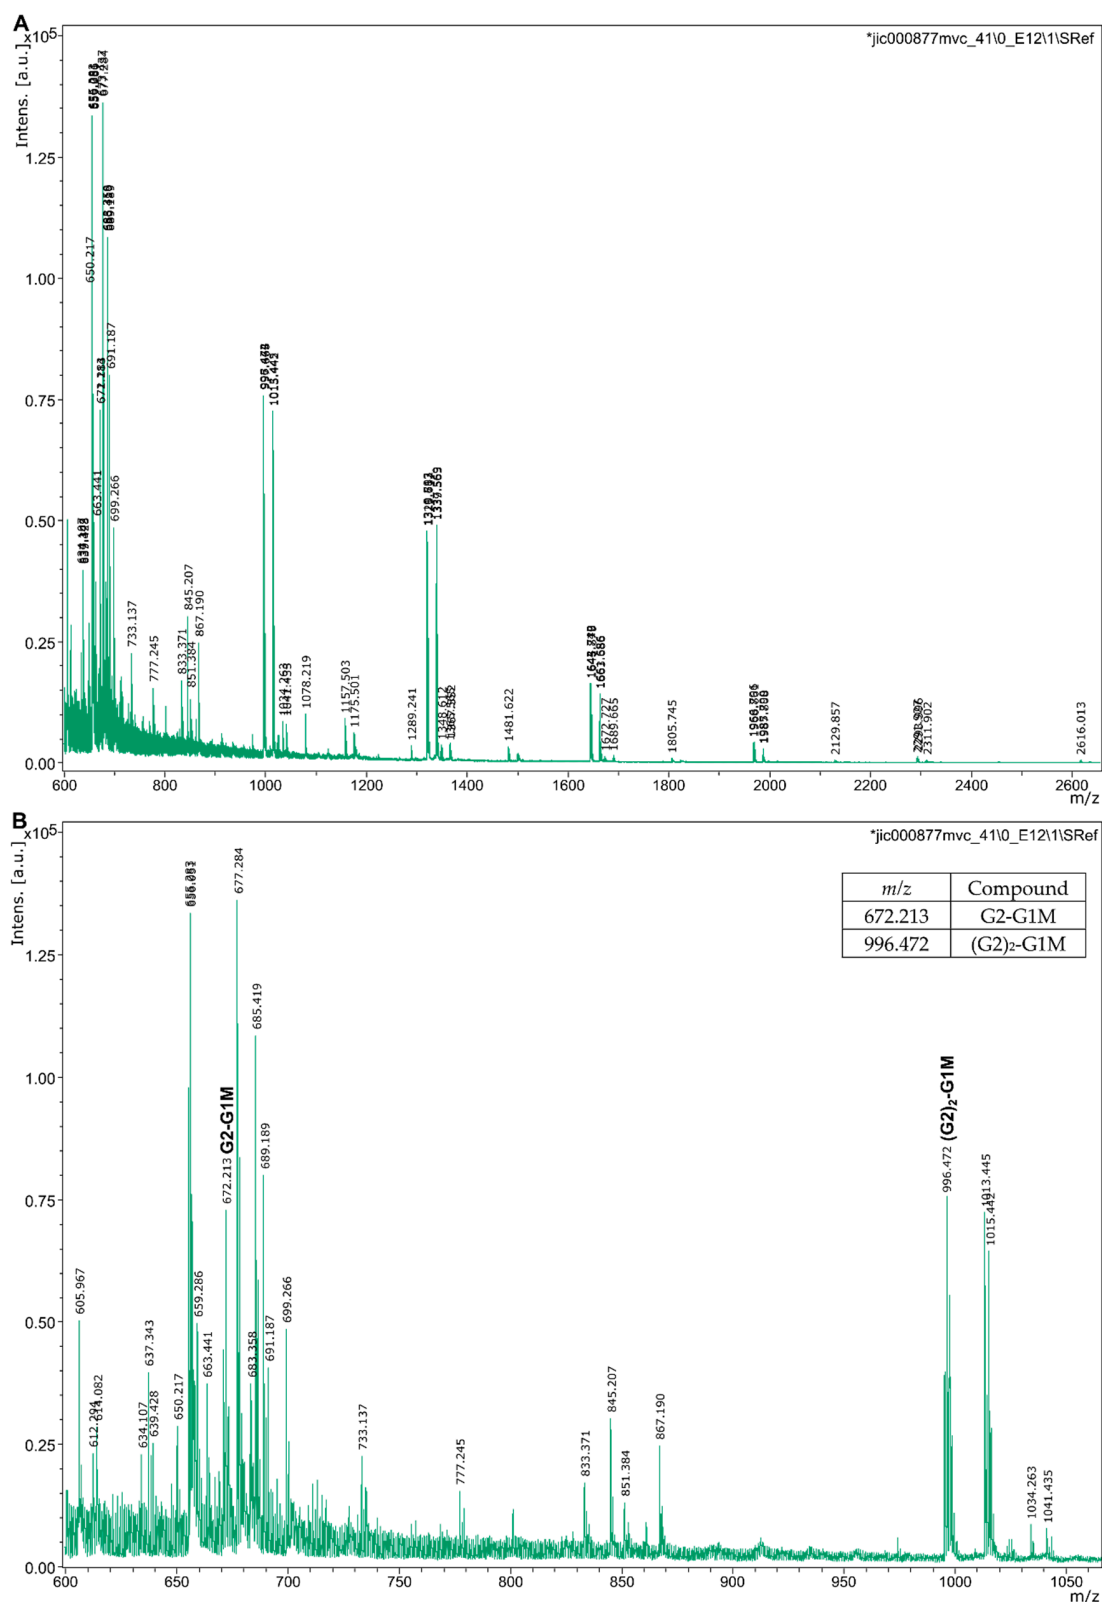

**Figure S8.** MALDI-TOF spectrum of TG products from 120 min reaction including  $\alpha$ -maltosyl fluoride (G2F) as donor and 4-*O*- $\alpha$ -D-glucopyranosyl-moranoline (G1M) as acceptor. (A) Full range and (B) zoomed range of panel A on the lower *m/z* range.

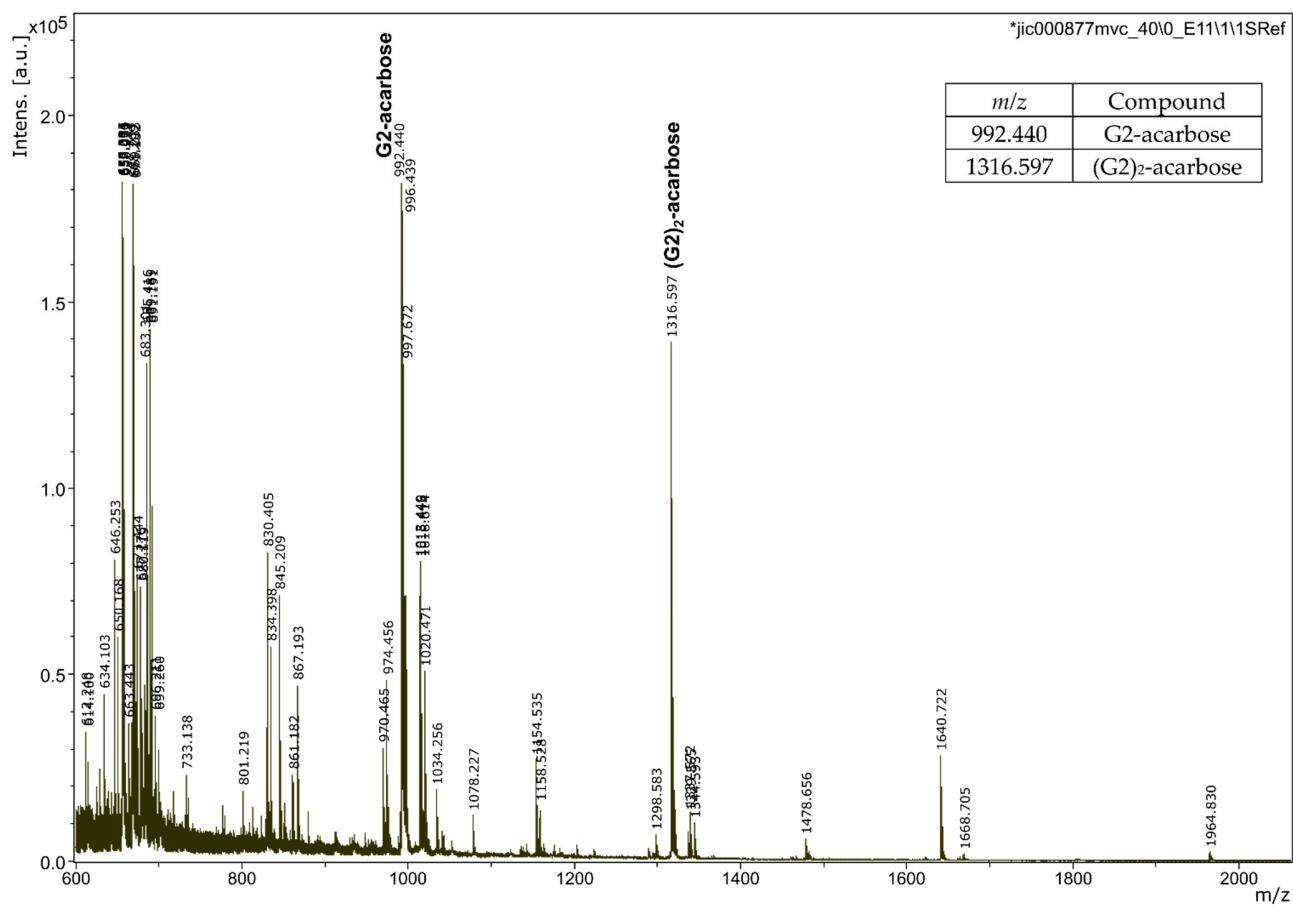

**Figure S9.** MALDI-TOF spectrum of TG products from 120 min reaction including  $\alpha$ -maltosyl fluoride (G2F) as donor and acarbose as acceptor.
